# Supplementary material for: Summation-exponent analysis for space-dependent reactor transients
Source: Royal Society of Chemistry journal article supplement (doi:10.1039/c7ib00005g), 1974-06-01
Supplement: c7ib00005g1.pdf [file c7ib00005g1.pdf]

## Supplementary Materials for

### **Chemical genomic analysis of GPR35 signaling**

Heidi (Haibei) Hu<sup>a,§</sup>, Huayun Deng<sup>a</sup>, Shizhang Ling<sup>a,§§</sup>, Haiyan Sun<sup>a,§§§</sup>,

Terry Kenakin<sup>b</sup>, Xinmiao Liang<sup>c</sup>, Ye Fang<sup>a,\*</sup>

<sup>a</sup>Biochemical Technologies, Science and Technology Division, Corning Incorporated, Corning, NY 14831, USA

<sup>b</sup>Department of Pharmacology, University of North Carolina School of Medicine, Chapel Hill, NC 27599, USA

<sup>c</sup>Key Laboratory of Separation Science for Analytical Chemistry, Dalian Institute of Chemical Physics, Chinese Academy of Sciences, Dalian, Liaoning, China

<sup>§</sup> Current address: Medical Laboratory Science, Jefferson College of Health Science, Roanoke, VA 24013, USA

<sup>§§</sup> Current address: Department of Medicine, Johns Hopkins University, Baltimore, MD, USA

<sup>§§§</sup> Current address: Laboratory for Inflammation and Cancer, Biodesign Institute, Arizona State University, Tempe, Arizona

\* Correspondence to: [fangy2@corning.com](mailto:fangy2@corning.com)

**This PDF file includes:**

- Fig. S1. Intra-plate data normalization for shRNA hit identification.
- Fig. S2. Characterization of GPR35 signaling pathway in HT-29 cells.
- Fig. S3. Pathway deconvolution of the DMR of zaprinast.
- Fig. S4. Impact of different compounds on the EGFR tyrosine kinase activity.
- Fig. S5. Effects of GPR35 agonist-treatment on HIF-1 $\alpha$  protein levels in serum starved HT-29 cells under normoxic condition.
- Fig. S6. Kinase network for resulting in resensitization of cells.
- Table S1. Excel data summarizing DNA microarray data and genes that gave rise to intensity greater 100 RFU under at least one treatment condition and displayed at least two fold changes in expression level.
- Table S2. The gene names, shRNA clones, and robust z-scores for the kinase hits identified for the early (10 min post stimulation) and late (50 min) events of the YE210 DMR.
- Table S3. The gene names, shRNA clones, and robust z-scores for a small set of kinase hits identified, where at least two shRNAs for the specific kinase altered the YE210 DMR by  $\geq 2$  MAD (median absolute deviation), but with opposite directions.

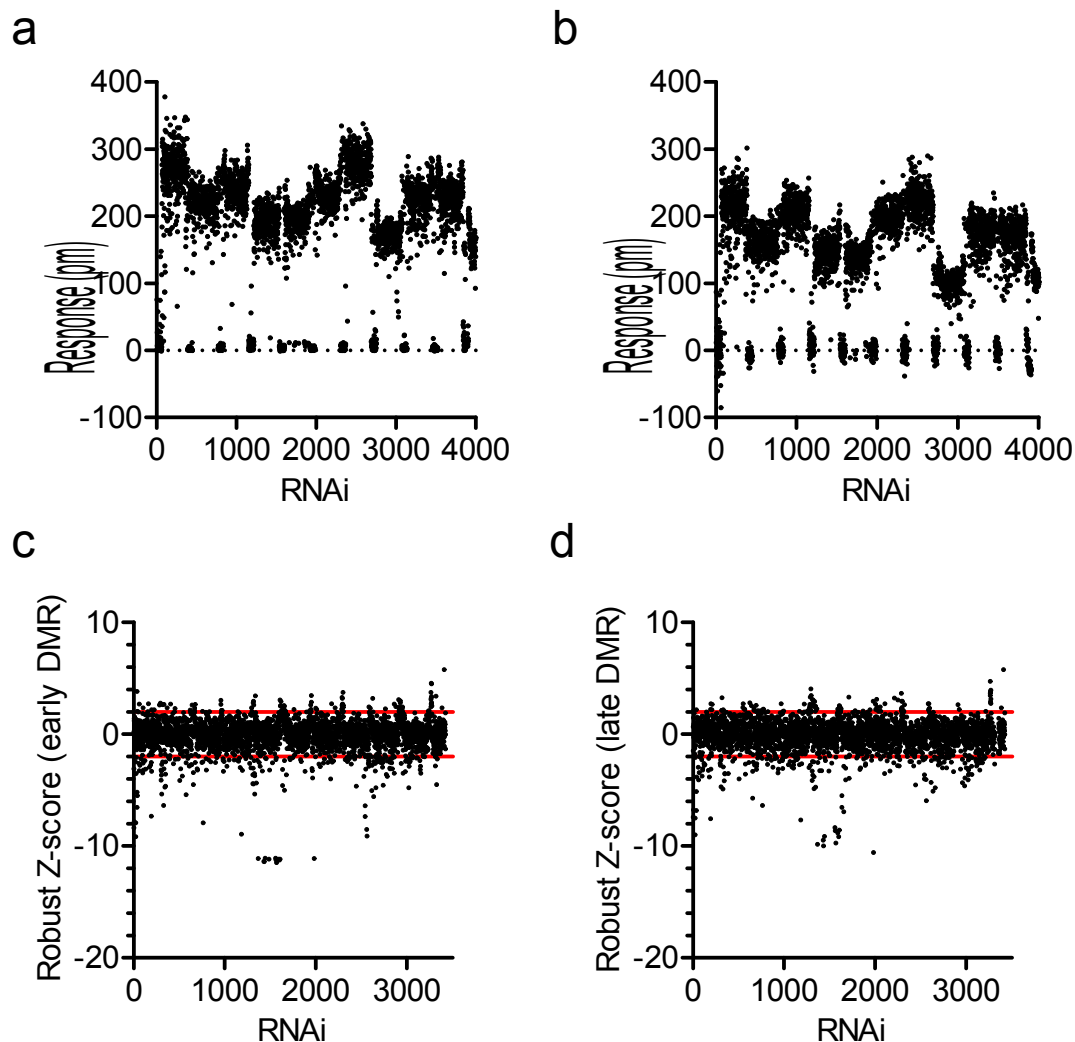

**Fig. S1.**

**Intra-plate data normalization for shRNA hit identification.** (a,b) The DMR amplitude, as indicated by response in picometer, Response (pm), at 10 min (a) or 50 min (b) post stimulation with YE210 as a function of shRNA treatment. (c,d) The robust z-score, a z-score not adversely affected by outliers, was calculated using  $[(\text{experimental data} - \text{median}) / \text{median absolute deviation (MAD)}]$  and plotted as a function of each shRNA treatment, based on the DMR amplitude at 10 min (c) or 50 min (d) post stimulation with YE210. Here, an intra-plate normalization approach was applied (see Methods).

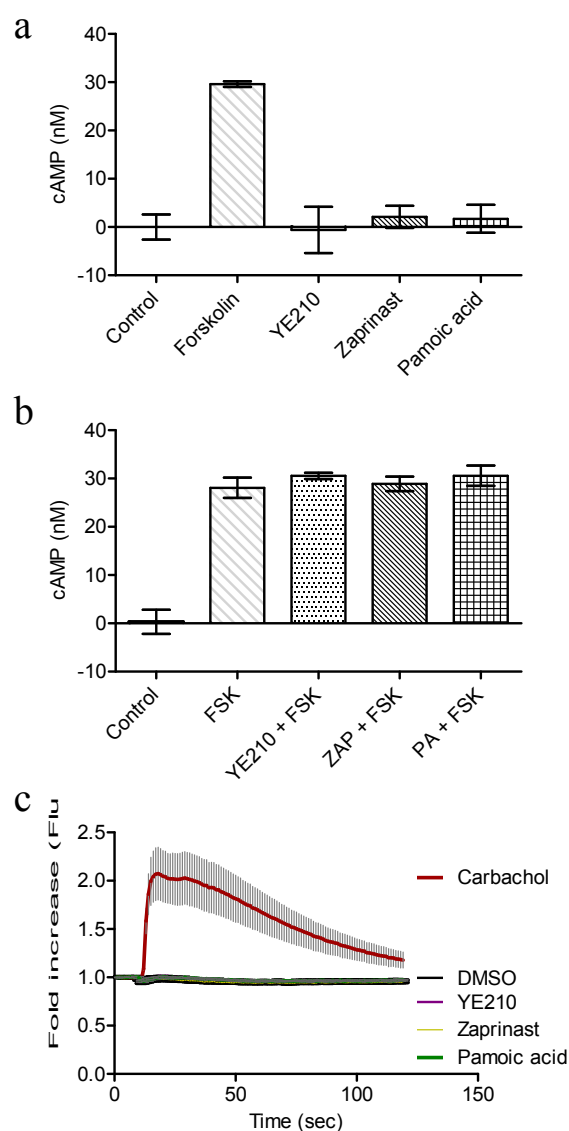

**Fig.S2**

**Characterization of GPR35 signaling pathway in HT-29 cells. (a) cAMP**

concentration as a function of compounds, each at 20  $\mu$ M. Cells were stimulated with each compound at 20  $\mu$ M for 30 min. (b) cAMP concentration as a function of compounds. Cells were stimulated for 30 min with 0.5  $\mu$ M forskolin (FSK) in the absence or presence of a GPR35 agonist, each at 20  $\mu$ M. (c) Fluo-4 Direct™ calcium assay signals, real-time fluorescence emission ratios, of three GPR35 agonists as well as carbachol, each at 10  $\mu$ M. Carbachol is an agonist for the endogenous  $G_q$ -coupled muscarinic M3 receptor in HT29, and used as the positive control. The data represent mean  $\pm$  standard deviation of 4 replicates for (a to c). These results suggest that three agonists tested, pamoic acid (PA), YE210, and zaprinast (ZAP), all were inactive in increasing cAMP (a), decreasing the forskolin-elevated cAMP (b), or causing  $Ca^{2+}$  mobilization (c).

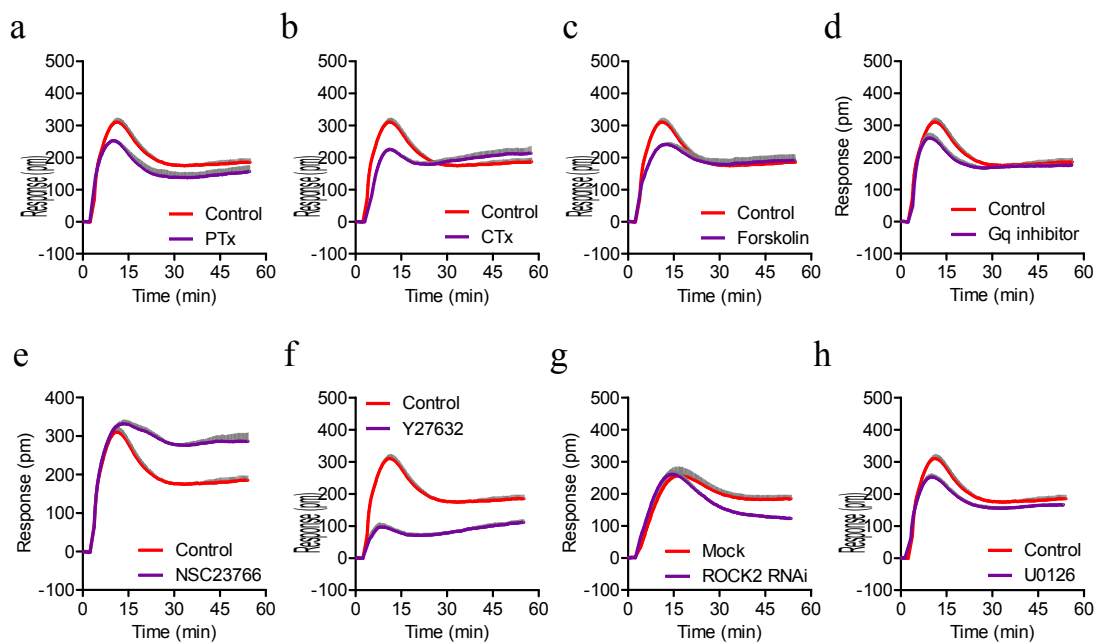

**Fig. S3**

**Pathway deconvolution of the DMR of zaprinast. (a-h)** The DMR of zaprinast in HT29 cells without (Control) or with pretreatment by 100 ng/ml pertussis toxin (PTx) (**a**); 400 ng/ml cholera toxin (CTx) (**b**); 10  $\mu$ M forskolin (**c**); 1  $\mu$ M FR900359 ( $G_q$  inhibitor) (**d**); 25  $\mu$ M NSC23766 (**e**); 10  $\mu$ M Y27632 (**f**); one ROCK2 siRNA (**g**); 10  $\mu$ M U0126 (**h**). In (**a-h**), data represents mean + standard deviation,  $N=4$  (2 independent measurements, each in duplicate). The standard deviation is shown in gray.

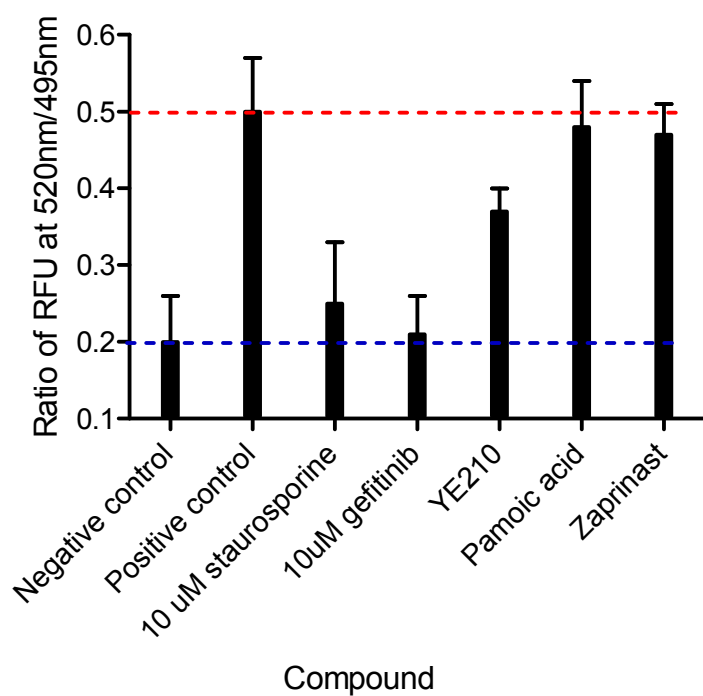

**Fig. S4.**

**Effects of different compounds on EGFR tyrosine kinase activity.** All compounds were assayed at 25  $\mu$ M, except for the two control compounds (staurosporine and Iressa) whose concentrations were indicated in the graph. Negative control: no EGFR kinase. Positive control: 50ng/ml EGFR plus 0.1 $\mu$ M the substrate as recommended by the supplier. Data are representative of three independent experiments.

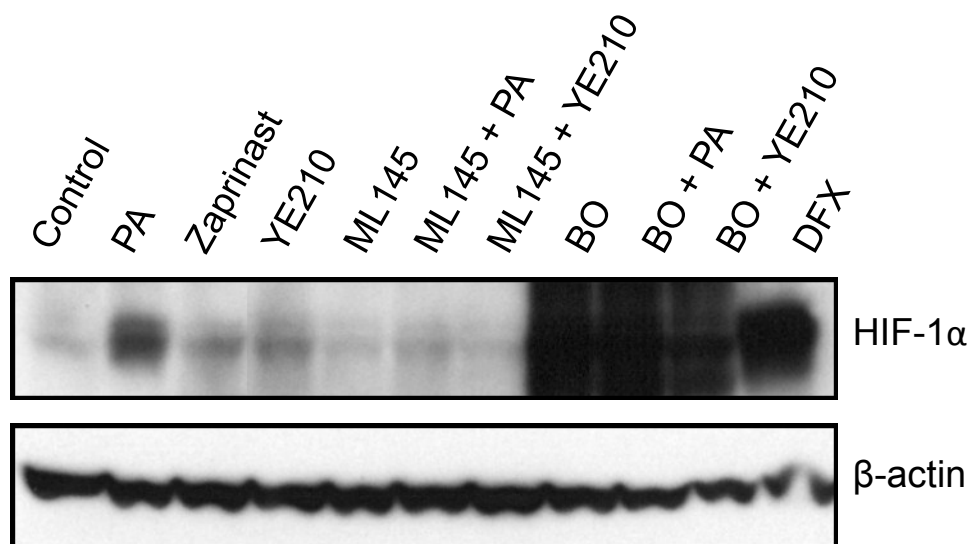

**Fig. S5.**

**Effects of GPR35 agonist-treatment on HIF-1 $\alpha$  protein levels in serum starved HT-29 cells under normoxic condition.** The concentrations of compounds were: 10  $\mu$ M pamoic acid (PA), 10  $\mu$ M zaprinast, 10  $\mu$ M YE210, 10  $\mu$ M ML145, 1  $\mu$ M bortezomib (BO), or 10  $\mu$ M deferoxamine mesylate (DFX). Both BO and DFX were used as the positive controls. Whole cell lysates were prepared at 5 hours post-treatment and HIF-1 $\alpha$  protein levels were determined by immunoblotting. Sample integrity was confirmed by immunoblotting for the  $\beta$ -actin as a control. Data are representative of three independent experiments.

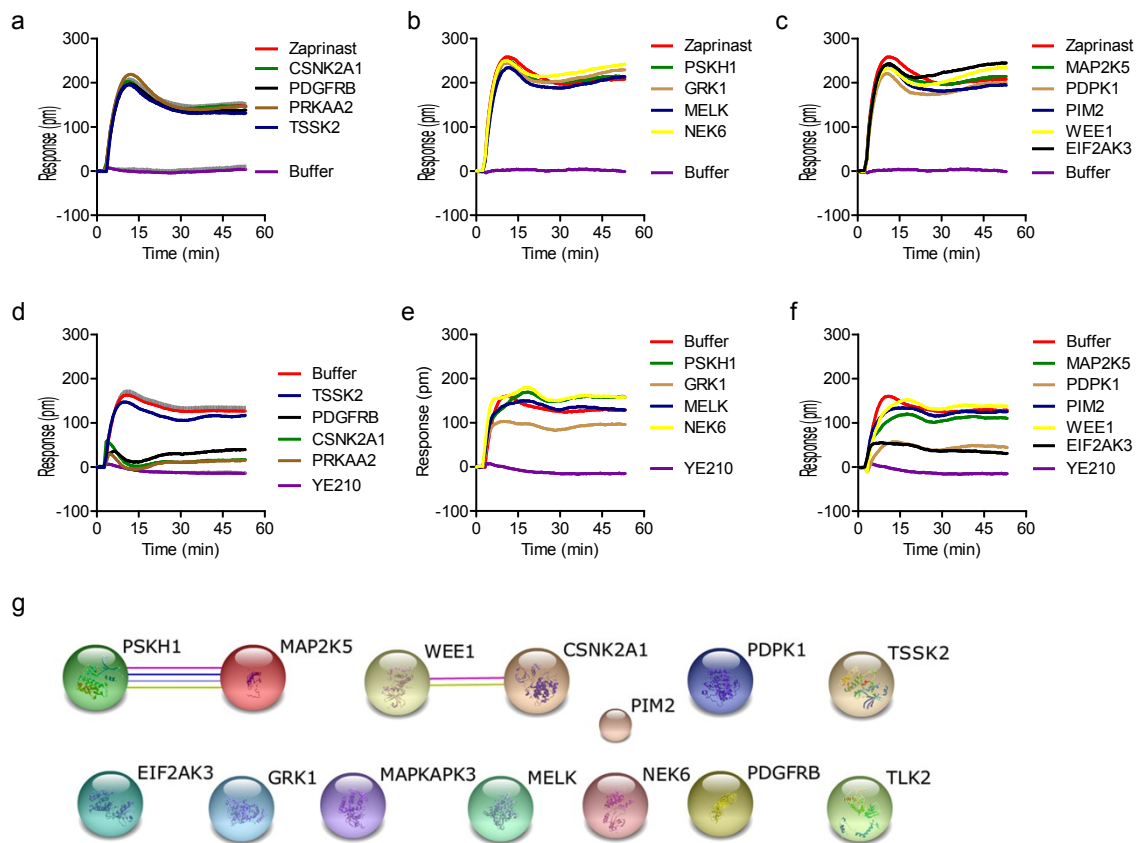

**Fig. S6.**

**Kinase network for resulting in resensitization of cells.** Here, the cells were treated with specific shRNAs, followed by stimulation with 1  $\mu$ M YE210 for 1 hour, and then 1  $\mu$ M zaprinast for another hour. Hits were selected based on that after shRNAi knockdown, cells gave rise to a DMR of YE210 comparable to the mock treated cells, but still responded to the subsequent stimulation with zaprinast. The network was generated using STRING 10. Connecting lines are color coded by the type of evidence used to build the network (details can be found in <http://string-db.org/>). Unconnected hits were also listed. GO enrichment analysis suggests that cytoskeleton organization (GO term 0007010), and response to stress (GO term 0006950) played important roles in the resensitization. Among these kinases, seven of them (MAP2K5, MELK, EIF2AK3, NEK6, MAPKAPK3, TLK2, WEE1) are known to involve in cell response to stress. Furthermore, five kinases, including TSSK2, PSKH1, MAP2K5, TLK2, and NEK6, are known to associate with cytoskeleton, while three (TSSK2, PSKH1, NEK6) are linked to microtubule organizing center, three (TSSK2, PDPK1 and PDGFRB) are linked to cytoplasmic membrane-bounded vesicle. Although these results have not been validated yet, these findings suggest a possibility that these kinases, at least in part, are involved the cellular mechanisms for GPR35 desensitization and resensitization process.



**Table S2.**

The gene names, shRNA clones, and robust z-scores for the kinase hits identified for the early (10 min post stimulation) and late (50 min) events of the YE210 DMR. These hits were identified when at least two shRNA clones for a single kinase within the library altered the YE210 DMR by  $\geq 2$  MAD (median absolute deviation); that is, a robust z-score of  $\geq 2$  or  $\leq -2$ . Results showed that there were 99 kinases in total, among which 42 were specific to the early DMR, 26 specific to the late DMR, and 32 common to both events. For the early DMR, there were 46 kinases whose knockdown decreased the DMR, and 27 kinases whose knockdown potentiated the DMR. On the other hand, for the late DMR, there were 35 kinases whose knockdown decreased the DMR, and 23 whose knockdown potentiated the DMR.

| Gene name | shRNA clone                | Early DMR<br>Robust z-score | Late DMR<br>robust z-score |
|-----------|----------------------------|-----------------------------|----------------------------|
| AAK1      | NM_014911.x-969s1c1        | -2.9                        | -1.6                       |
| AAK1      | NM_014911.2-2971s1c1       | -2.0                        | -1.7                       |
| ABL1      | NM_005157.x-3369s1c1       | -2.5                        | -2.8                       |
| ABL1      | NM_005157.3-1127s1c1       | -2.0                        | -1.5                       |
| ABL1      | NM_005157.2-1226s1c1       | -0.6                        | -2.6                       |
| ACVR1B    | NM_020328.x-783s1c1        | -1.8                        | -3.5                       |
| ACVR1B    | NM_020328.x-480s1c1        | -1.1                        | -3.1                       |
| AKT1      | NM_005163.1-1694s1c1       | -2.4                        | -1.3                       |
| AKT1      | NM_005163.x-1044s1c1       | -2.0                        | -1.9                       |
| AKT3      | NM_005465.3-437s1c1        | -5.6                        | -5.1                       |
| AKT3      | NM_005465.3-280s1c1        | -2.4                        | -0.8                       |
| ALPK1     | NM_001102406.1,NM_025144.3 | -3.9                        | -2.0                       |
| ALPK1     | NM_001102406.1,NM_025144.3 | -3.3                        | -2.3                       |
| ALPK1     | NM_001102406.1,NM_025144.3 | -3.1                        | 1.2                        |
| ATM       | NM_000051.2-9380s1c1       | 2.0                         | 1.8                        |
| ATM       | NM_000051.2-9426s1c1       | 2.7                         | 1.7                        |
| AURKB     | NM_004217.x-883s1c1        | -3.5                        | -4.3                       |
| AURKB     | NM_004217.x-468s1c1        | -3.1                        | -2.9                       |
| BCKDK     | NM_005881.x-681s1c1        | 3.1                         | 4.7                        |
| BCKDK     | NM_005881.x-850s1c1        | 3.7                         | 3.7                        |
| BLK       | NM_001715.2-1626s1c1       | -2.4                        | -2.1                       |
| BLK       | NM_001715.x-261s1c1        | -2.4                        | -2.6                       |
| BMPR1A    | NM_004329.x-880s1c1        | -2.6                        | -2.4                       |
| BMPR1A    | NM_004329.2-2082s1c1       | -2.6                        | -1.6                       |
| BMPR2     | NM_001204.x-1962s1c1       | -7.9                        | -7.5                       |
| BMPR2     | NM_001204.x-488s1c1        | -2.5                        | -1.8                       |
| BRD2      | NM_005104.2-3578s1c1       | 1.5                         | 2.0                        |
| BRD2      | NM_005104.2-2059s1c1       | 1.7                         | 2.3                        |
| BRD2      | NM_005104.2-3720s1c1       | 1.4                         | 2.4                        |
| BRDT      | NM_001726.1-1632s1c1       | 1.6                         | 2.5                        |

|         |                      |       |      |
|---------|----------------------|-------|------|
| BRDT    | NM_001726.1-2117s1c1 | 2.0   | 1.1  |
| BRDT    | NM_001726.1-629s1c1  | 2.5   | 2.1  |
| BUB1B   | NM_001211.x-3346s1c1 | -3.5  | -2.1 |
| BUB1B   | NM_001211.x-521s1c1  | -2.1  | -1.0 |
| CAMK2A  | NM_171825.x-394s1c1  | 2.8   | 2.8  |
| CAMK2A  | NM_171825.x-1181s1c1 | 3.4   | 3.1  |
| CAMK2A  | NM_171825.x-1116s1c1 | 4.5   | 3.9  |
| CAMK2B  | NM_001220.x-2338s1c1 | -6.5  | -5.1 |
| CAMK2B  | NM_001220.x-1815s1c1 | -5.2  | -6.8 |
| CAMK2G  | NM_001222.x-2251s1c1 | 2.0   | 1.1  |
| CAMK2G  | NM_001222.x-279s1c1  | 2.7   | 1.4  |
| CAMKK1  | NM_172207.x-1434s1c1 | -3.3  | -3.1 |
| CAMKK1  | NM_172207.x-578s1c1  | -2.3  | -2.4 |
| CAMKV   | NM_024046.x-910s1c1  | -2.8  | -1.3 |
| CAMKV   | NM_024046.x-346s1c1  | -2.0  | -2.7 |
| CDC2L1  | NM_001787.1-2043s1c1 | 1.8   | 2.0  |
| CDC2L1  | NM_001787.1-511s1c1  | 1.5   | 2.0  |
| CDC2L1  | NM_001787.1-2259s1c1 | 1.6   | 2.2  |
| CDC2L1  | NM_001787.1-1490s1c1 | 2.1   | 2.3  |
| CDC2L1  | NM_001787.1-1156s1c1 | 2.9   | 1.9  |
| CDC2L6  | NM_015076.x-1837s1c1 | -3.5  | -2.5 |
| CDC2L6  | NM_015076.x-639s1c1  | -2.4  | -1.2 |
| CDK3    | NM_001258.x-1097s1c1 | -3.3  | -4.1 |
| CDK3    | NM_001258.x-618s1c1  | -0.9  | -2.0 |
| CDK4    | NM_000075.x-258s1c1  | -9.2  | -9.0 |
| CDK4    | NM_000075.2-818s1c1  | -2.5  | -1.6 |
| CDK5    | NM_004935.2-954s1c1  | -1.9  | -2.8 |
| CDK5    | NM_004935.2-208s1c1  | -0.6  | -2.1 |
| CDK5    | NM_004935.2-335s1c1  | -1.8  | -2.1 |
| CDK6    | NM_001259.5-4765s1c1 | -3.8  | -3.0 |
| CDK6    | NM_001259.3-1297s1c1 | -0.8  | -2.3 |
| CDK9    | NM_001261.2-1094s1c1 | -2.6  | -0.1 |
| CDK9    | NM_001261.2-858s1c1  | -2.3  | 0.6  |
| CDKL1   | NM_004196.3-433s1c1  | -11.2 | -8.6 |
| CDKL1   | NM_004196.3-706s1c1  | -11.1 | -8.3 |
| CHEK1   | NM_001274.x-508s1c1  | -3.5  | -2.3 |
| CHEK1   | NM_001274.2-1196s1c1 | -2.5  | 0.0  |
| CLK1    | NM_004071.x-1435s1c1 | -5.3  | -4.7 |
| CLK1    | NM_004071.x-1746s1c1 | -3.2  | -2.8 |
| CLK1    | NM_004071.x-762s1c1  | -2.7  | -2.2 |
| CLK4    | NM_020666.x-1413s1c1 | 2.1   | 1.1  |
| CLK4    | NM_020666.x-661s1c1  | 2.1   | 0.8  |
| CSNK1G1 | NM_022048.x-1348s1c1 | -2.2  | -3.0 |
| CSNK1G2 | NM_001319.5-521s1c1  | -2.4  | -0.8 |
| DDR1    | NM_001954.x-1857s1c1 | -2.9  | -3.2 |
| DDR1    | NM_001954.x-1358s1c1 | -0.1  | -2.1 |

|         |                      |       |      |
|---------|----------------------|-------|------|
| DYRK3   | NM_003582.x-658s1c1  | -2.5  | 2.2  |
| DYRK3   | NM_003582.2-1880s1c1 | -2.4  | -3.9 |
| DYRK4   | NM_003845.x-1755s1c1 | -4.7  | -3.5 |
| DYRK4   | NM_003845.1-1342s1c1 | -2.1  | -1.3 |
| EIF2AK2 | NM_002759.x-474s1c1  | 2.0   | 2.8  |
| EIF2AK2 | NM_002759.x-1409s1c1 | 2.2   | 1.0  |
| EPHA3   | NM_005233.3-1787s1c1 | 2.1   | -0.1 |
| EPHA3   | NM_005233.3-2263s1c1 | 2.2   | 0.7  |
| EPHA3   | NM_005233.3-301s1c1  | 2.3   | 0.5  |
| EPHA3   | NM_005233.3-1442s1c1 | 2.6   | 1.5  |
| EPHA5   | NM_004439.3-1346s1c1 | 2.0   | 0.8  |
| EPHA5   | NM_004439.3-3190s1c1 | 2.5   | 0.8  |
| EPHA7   | NM_004440.2-1859s1c1 | 2.0   | 0.2  |
| EPHA7   | NM_004440.2-3052s1c1 | 2.1   | 0.8  |
| ERBB3   | NM_001982.1-1904s1c1 | 2.7   | 1.1  |
| ERBB3   | NM_001982.1-2653s1c1 | 3.8   | 1.7  |
| FER     | NM_005246.x-1193s1c1 | 0.7   | 2.5  |
| FER     | NM_005246.x-883s1c1  | 0.5   | 2.7  |
| FES     | NM_002005.x-1641s1c1 | -3.7  | -2.3 |
| FES     | NM_002005.x-1875s1c1 | -3.3  | -2.0 |
| FGFR1   | NM_000604.x-2463s1c1 | -1.1  | -2.6 |
| FGFR1   | NM_000604.2-3436s1c1 | -1.6  | -2.4 |
| GAK     | NM_005255.1-4112s1c1 | -0.4  | -2.2 |
| GAK     | NM_005255.x-4100s1c1 | -0.4  | -2.2 |
| GRK7    | NM_139209.x-1781s1c1 | -1.9  | -3.3 |
| GRK7    | NM_139209.x-1725s1c1 | -1.5  | -2.1 |
| IGF1R   | NM_000875.2-2427s1c1 | 0.2   | -2.8 |
| IGF1R   | NM_000875.2-4308s1c1 | 0.5   | -2.0 |
| IRAK1   | NM_001569.x-2188s1c1 | -7.3  | -7.6 |
| IRAK1   | NM_001569.x-1049s1c1 | -3.3  | -3.1 |
| IRAK1   | NM_001569.3-1603s1c1 | -0.1  | -2.0 |
| ITK     | NM_005546.3-933s1c1  | -2.2  | -2.5 |
| ITK     | NM_005546.x-614s1c1  | -1.6  | -2.1 |
| JAK1    | NM_002227.x-849s1c1  | -11.4 | -9.5 |
| JAK1    | NM_002227.1-2927s1c1 | -2.7  | -1.6 |
| JAK1    | NM_002227.1-3336s1c1 | -2.4  | -0.3 |
| JAK1    | NM_002227.1-1148s1c1 | -2.1  | -1.7 |
| LIMK1   | NM_002314.x-3140s1c1 | -3.6  | -3.5 |
| LIMK1   | NM_002314.2-980s1c1  | -2.4  | -0.2 |
| MAP2K3  | NM_002756.x-1036s1c1 | 2.1   | 0.7  |
| MAP2K3  | NM_002756.x-826s1c1  | 2.1   | 0.8  |
| MAP3K6  | NM_004672.x-1039s1c1 | 1.7   | 3.1  |
| MAP3K6  | NM_004672.x-1283s1c1 | 2.8   | 3.1  |
| MAP3K6  | NM_004672.x-832s1c1  | 2.9   | 2.7  |
| MAP3K9  | NM_033141.2-749s1c1  | -3.4  | -4.6 |
| MAP3K9  | NM_033141.2-2603s1c1 | -1.9  | -2.6 |

|        |                      |       |       |
|--------|----------------------|-------|-------|
| MAPK14 | NM_001315.x-3701s1c1 | -2.4  | -3.1  |
| MAPK14 | NM_139012.x-877s1c1  | -1.0  | -2.2  |
| MARK4  | NM_031417.2-2010s1c1 | 2.0   | 1.0   |
| MARK4  | NM_031417.2-2431s1c1 | 2.2   | -0.4  |
| MARK4  | NM_031417.2-261s1c1  | 2.2   | -0.7  |
| MARK4  | NM_031417.2-351s1c1  | 3.5   | -0.7  |
| MELK   | NM_014791.2-1805s1c1 | 2.8   | 1.0   |
| MELK   | NM_014791.2-413s1c1  | 3.0   | 1.1   |
| MET    | NM_000245.2-2829s1c1 | 2.3   | 2.3   |
| MET    | NM_000245.1-2037s1c1 | 2.7   | 2.1   |
| MET    | NM_000245.1-1190s1c1 | 3.2   | 3.0   |
| MINK1  | NM_015716.2-2483s1c1 | 2.3   | 0.5   |
| MINK1  | NM_015716.2-1042s1c1 | 2.5   | 0.6   |
| MKNK1  | NM_003684.3-1404s1c1 | 2.2   | 1.0   |
| MKNK1  | NM_003684.3-284s1c1  | 2.3   | 0.1   |
| MLKL   | NM_152649.1-916s1c1  | -7.4  | -4.0  |
| MLKL   | NM_152649.x-1935s1c1 | -2.2  | -2.3  |
| MLKL   | NM_152649.1-1269s1c1 | -1.1  | -2.2  |
| MST1R  | NM_002447.x-609s1c1  | -11.4 | -10.0 |
| MST1R  | NM_002447.1-831s1c1  | -3.1  | 1.1   |
| NTRK2  | NM_006180.x-2123s1c1 | -2.6  | -3.0  |
| NTRK2  | NM_006180.3-5300s1c1 | -2.5  | 0.9   |
| PAK4   | NM_005884.x-1093s1c1 | 2.5   | 3.5   |
| PAK4   | NM_005884.x-285s1c1  | 2.7   | 3.8   |
| PAK4   | NM_005884.x-1540s1c1 | 2.7   | 2.9   |
| PAK4   | NM_005884.x-463s1c1  | 3.3   | 2.8   |
| PAK4   | NM_005884.x-1335s1c1 | 4.6   | 3.9   |
| PDK2   | NM_002611.x-834s1c1  | 1.7   | 4.0   |
| PDK2   | NM_002611.x-158s1c1  | 2.0   | 3.5   |
| PDK2   | NM_002611.x-803s1c1  | 2.4   | 2.0   |
| PFTK1  | NM_012395.x-416s1c1  | 0.6   | 2.1   |
| PFTK1  | NM_012395.x-1166s1c1 | 0.8   | 2.1   |
| PFTK1  | NM_012395.x-456s1c1  | 1.7   | 4.0   |
| PHKG1  | NM_006213.2-181s1c1  | 2.5   | 2.4   |
| PHKG1  | NM_006213.2-170s1c1  | 3.1   | 2.6   |
| PIM1   | NM_002648.2-1530s1c1 | 1.4   | 2.2   |
| PIM1   | NM_002648.2-528s1c1  | 2.5   | 2.7   |
| PLK4   | NM_014264.x-433s1c1  | 1.3   | 2.5   |
| PLK4   | NM_014264.2-2974s1c1 | 2.0   | 2.9   |
| PLK4   | NM_014264.2-1087s1c1 | 2.4   | 1.8   |
| PLK4   | NM_014264.2-3108s1c1 | 2.5   | 1.7   |
| PRKACB | NM_002731.2-1710s1c1 | -5.0  | -4.3  |
| PRKACB | NM_002731.2-523s1c1  | -2.8  | -2.4  |
| PRKACB | NM_002731.x-722s1c1  | -2.5  | -1.9  |
| PRKCE  | NM_005400.x-591s1c1  | -2.2  | -3.5  |
| PRKCE  | NM_005400.x-1288s1c1 | -2.0  | -0.9  |

|         |                      |       |      |
|---------|----------------------|-------|------|
| PRKCH   | NM_006255.2-2285s1c1 | -11.3 | -9.2 |
| PRKCH   | NM_006255.3-481s1c1  | -2.3  | -3.5 |
| PRKDC   | NM_006904.6-1724s1c1 | -2.3  | -0.8 |
| PRKDC   | NM_006904.6-8611s1c1 | -2.1  | -1.5 |
| PTK2    | NM_005607.3-2779s1c1 | -1.9  | -2.8 |
| PTK2    | NM_005607.3-664s1c1  | -1.8  | -2.5 |
| PTK2    | NM_005607.x-2659s1c1 | -1.0  | -2.2 |
| PTK2    | NM_005607.3-817s1c1  | -0.2  | -2.0 |
| RET     | NM_020630.3-2529s1c1 | -2.3  | -0.5 |
| RET     | NM_020630.3-3378s1c1 | -3.1  | -2.6 |
| RET     | NM_000323.2-1587s1c1 | -3.3  | -2.2 |
| RIOK2   | NM_018343.1-1403s1c1 | 2.4   | 0.7  |
| RIOK2   | NM_018343.1-1082s1c1 | 3.0   | 1.1  |
| RIPK1   | NM_003804.x-1470s1c1 | -4.7  | -4.2 |
| RIPK1   | NM_003804.3-1266s1c1 | -2.5  | -2.0 |
| RIPK1   | NM_003804.3-2672s1c1 | -2.4  | -2.1 |
| ROCK2   | NM_004850.3-3765s1c1 | -2.4  | -2.6 |
| ROCK2   | NM_004850.3-583s1c1  | -2.2  | -0.2 |
| ROCK2   | NM_004850.3-5578s1c1 | -0.7  | -2.0 |
| ROR2    | NM_004560.x-3357s1c1 | -4.5  | -5.7 |
| ROR2    | NM_004560.2-1472s1c1 | -3.3  | -2.0 |
| ROR2    | NM_004560.2-3807s1c1 | -2.0  | -1.1 |
| ROR2    | NM_004560.x-1564s1c1 | -0.2  | -2.5 |
| ROS1    | NM_002944.x-3659s1c1 | 1.3   | 2.2  |
| ROS1    | NM_002944.x-294s1c1  | 1.5   | 2.2  |
| RPS6KA5 | NM_004755.x-677s1c1  | -0.1  | 2.3  |
| RPS6KA5 | NM_004755.x-336s1c1  | 2.3   | 2.1  |
| RPS6KB1 | NM_003161.x-1501s1c1 | 1.6   | 2.5  |
| RPS6KB1 | NM_003161.x-1561s1c1 | 3.4   | 2.9  |
| RYK     | NM_002958.x-377s1c1  | 1.0   | 2.0  |
| RYK     | NM_002958.x-1526s1c1 | 0.8   | 2.2  |
| SIK3    | NM_025164.3-5245s1c1 | 2.1   | 0.5  |
| SIK3    | NM_025164.3-968s1c1  | 2.3   | 1.7  |
| STK11   | NM_000455.x-505s1c1  | -3.5  | -3.8 |
| STK11   | NM_000455.x-548s1c1  | -1.9  | -2.3 |
| STK24   | NM_003576.2-968s1c1  | -4.6  | -3.0 |
| STK24   | NM_003576.2-792s1c1  | -2.2  | -1.1 |
| STK24   | NM_003576.x-606s1c1  | -1.1  | -3.8 |
| STK32B  | NM_018401.1-400s1c1  | -3.0  | -2.0 |
| STK32B  | NM_018401.1-901s1c1  | -2.3  | -1.4 |
| STK40   | NM_032017.1-1244s1c1 | -3.1  | -1.6 |
| STK40   | NM_032017.1-2697s1c1 | -3.0  | -1.7 |
| STRADA  | NM_153335.4-693s1c1  | -2.5  | -3.1 |
| STRADA  | NM_153335.4-750s1c1  | -1.0  | -2.2 |
| STRADB  | NM_018571.4-397s1c1  | -2.1  | -2.9 |
| STRADB  | NM_018571.4-435s1c1  | -2.1  | -3.6 |

|        |                      |      |      |
|--------|----------------------|------|------|
| TGFBR1 | NM_004612.2-758s1c1  | -2.4 | -1.7 |
| TGFBR1 | NM_004612.1-1463s1c1 | -2.0 | -0.5 |
| TNIK   | XM_039796.9-4033s1c1 | 1.6  | 2.1  |
| TNIK   | XM_039796.9-3935s1c1 | -0.9 | 2.4  |
| TSSK6  | NM_032037.1-365s1c1  | 0.8  | 2.2  |
| TSSK6  | NM_032037.1-694s1c1  | 0.2  | 2.7  |
| TWF2   | NM_007284.3-1275s1c1 | -2.0 | -2.1 |
| TWF2   | NM_007284.3-897s1c1  | -1.4 | -2.2 |
| TXK    | NM_003328.1-1280s1c1 | -2.1 | -2.1 |
| TXK    | NM_003328.1-2159s1c1 | -2.1 | -1.6 |
| TYK2   | NM_003331.x-3209s1c1 | -4.5 | -3.7 |
| TYK2   | NM_003331.x-533s1c1  | -4.4 | -4.1 |
| TYK2   | NM_003331.x-4078s1c1 | -3.0 | -2.4 |
| ULK2   | NM_014683.2-780s1c1  | -3.1 | -0.6 |
| ULK2   | NM_014683.2-597s1c1  | -2.0 | -1.1 |
| UNK    | XM_038576.7-890s1c1  | -2.6 | -1.5 |
| UNK    | NM_016151.x-1186s1c1 | -2.5 | -2.2 |
| UNK    | NM_025164.3-2987s1c1 | -2.2 | -0.7 |
| UNK    | NM_025164.3-406s1c1  | -1.7 | -2.0 |
| YES1   | NM_005433.3-1351s1c1 | 2.0  | 1.6  |
| YES1   | NM_005433.3-1473s1c1 | 2.0  | 3.7  |
| YES1   | NM_005433.3-744s1c1  | 2.6  | 2.3  |
| ZAP70  | NM_001079.x-1820s1c1 | -7.8 | -6.8 |
| ZAP70  | NM_001079.x-2393s1c1 | -3.1 | -1.5 |

**Table S3.**

The gene names, shRNA clones, and robust z-scores for a small set of kinase hits identified, where at least two shRNAs for the specific kinase altered the YE210 DMR by  $\geq 2$  MAD (median absolute deviation), but with opposite directions. There were 15 kinases in total. These kinases were excluded from the follow-up analysis.

| Gene name       | shRNA clone          | Early DMR      | Late DMR       |
|-----------------|----------------------|----------------|----------------|
|                 |                      | Robust z score | robust z score |
| <b>ALPK2</b>    | NM_052947.1-6185s1c1 | -2.4           | -3.0           |
|                 | NM_052947.1-5452s1c1 | 2.9            | 1.4            |
| <b>AXL</b>      | NM_021913.x-1881s1c1 | -3.1           | -1.8           |
|                 | NM_001699.x-1854s1c1 | 2.7            | 1.5            |
| <b>CDC2L2</b>   | NM_024011.1-155s1c1  | -1.0           | -2.0           |
|                 | NM_024011.1-276s1c1  | 0.6            | 3.3            |
| <b>CDC2L5</b>   | NM_003718.x-5160s1c1 | -6.4           | -4.9           |
|                 | NM_003718.x-3040s1c1 | 2.7            | 2.2            |
| <b>CDC42BPA</b> | NM_014826.x-1153s1c1 | -3.4           | -3.3           |
|                 | NM_006035.x-5307s1c1 | 2.7            | 1.8            |
| <b>CDK10</b>    | NM_003674.2-1496s1c1 | -8.5           | -4.0           |
|                 | NM_052987.x-186s1c1  | 3.0            | 1.9            |
| <b>CDKL3</b>    | NM_016508.x-1442s1c1 | -4.4           | -4.7           |
|                 | NM_016508.x-250s1c1  | 1.4            | 2.0            |
| <b>CSNK1E</b>   | NM_001894.4-2069s1c1 | -3.8           | -3.0           |
|                 | NM_152221.x-895s1c1  | 1.5            | 2.7            |
| <b>EPHA1</b>    | NM_005232.2-2341s1c1 | -3.2           | -5.5           |
|                 | NM_005232.2-159s1c1  | 2.2            | 1.4            |
| <b>FGFR3</b>    | NM_000142.x-1972s1c1 | -5.5           | -3.8           |
|                 | NM_000142.x-3699s1c1 | 3.8            | 2.2            |
| <b>MYLK4</b>    | XM_373109.2-850s1c1  | -2.0           | -0.3           |
|                 | XM_373109.2-1045s1c1 | 2.3            | 0.8            |
| <b>PKN1</b>     | NM_002741.x-525s1c1  | -3.2           | -0.7           |
|                 | NM_002741.x-2064s1c1 | 2.0            | 1.9            |
| <b>PTK6</b>     | NM_005975.2-1506s1c1 | -2.2           | -2.8           |
|                 | NM_005975.2-1064s1c1 | 2.6            | 2.2            |
| <b>RPS6KB2</b>  | NM_003952.2-371s1c1  | -4.8           | -4.1           |
|                 | NM_003952.x-440s1c1  | 2.6            | 1.1            |
| <b>TTK</b>      | NM_003318.3-2515s1c1 | -2.2           | -2.1           |
|                 | NM_003318.3-522s1c1  | 2.2            | 0.0            |

**Table S1**

Excel data summarizing DNA microarray data and genes that gave rise to intensity greater 100 RFU under at least one treatment condition and displayed at least two fold changes in expression level.
